# Supplementary material for: Fabrication of a ternary CdS/ZnIn2S4/TiO2 heterojunction for enhancing photoelectrochemical performance: effect of cascading electron–hole transfer
Source: Royal Society of Chemistry journal article supplement (doi:10.1039/c5ta07454a), 2015-01-01
Supplement: c5ta07454a1.pdf [file c5ta07454a1.pdf]

## Supporting Information

### **Fabrication of a ternary CdS/ZnIn<sub>2</sub>S<sub>4</sub>/TiO<sub>2</sub> heterojunction for enhancing photoelectrochemical performance: Effect of cascading electron-hole transfer**

Mahadeo A. Mahadik, Pravin S. Shinde, Min Cho\* and Jum Suk Jang\*

Division of Biotechnology, Advanced Institute of Environmental and Bioscience, College of Environmental and Bioresource Sciences, Chonbuk National University, Iksan 570-752, Republic of Korea

\*Corresponding authors. Tel.: +82 63 850 0846; fax: +82 63 850 0834.

E-mail addresses: jangjs75@jbnu.ac.kr (J.S. Jang), cho317@jbnu.ac.kr (Min Cho).

**Table S1**

Elemental composition of the CdS/ZnIn<sub>2</sub>S<sub>4</sub>/TiO<sub>2</sub> architecture film obtained from TEM-EDX data.

| Elements | Atomic composition (%) |
|----------|------------------------|
| O K      | 24.06                  |
| S K      | 25.16                  |
| Ti K     | 23.82                  |
| Zn K     | 0.29                   |
| Cd L     | 23.45                  |
| In L     | 3.22                   |

### Reaction mechanism of CdS formation

The aqueous ammonia solution was reacted with  $\text{Cd}(\text{NO}_3)_2$  to produce the white precipitate of  $\text{Cd}(\text{OH})_2$ . The excess amount of aqueous ammonia solution dissolves the  $\text{Cd}(\text{OH})_2$  and forms the tetra amine cadmium  $[\text{Cd}(\text{NH}_3)_4]^{2+}$ . Addition of thiourea to this solution, the  $\text{CN}_2\text{H}_2$  and  $\text{SH}^-$  products could be formed. Then,  $\text{SH}^-$  reacts with  $[\text{Cd}(\text{NH}_3)_4]^{2+}$  and form the CdS. The reaction mechanism is given below (reaction 1 to 4).

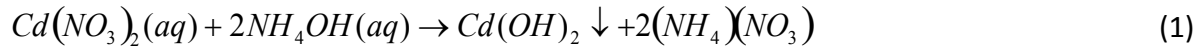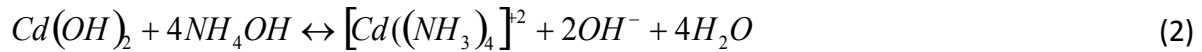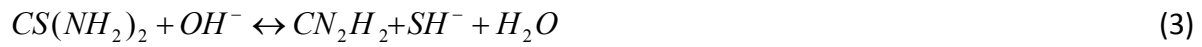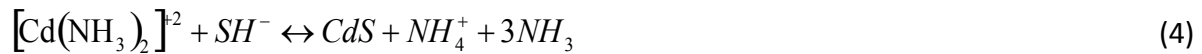

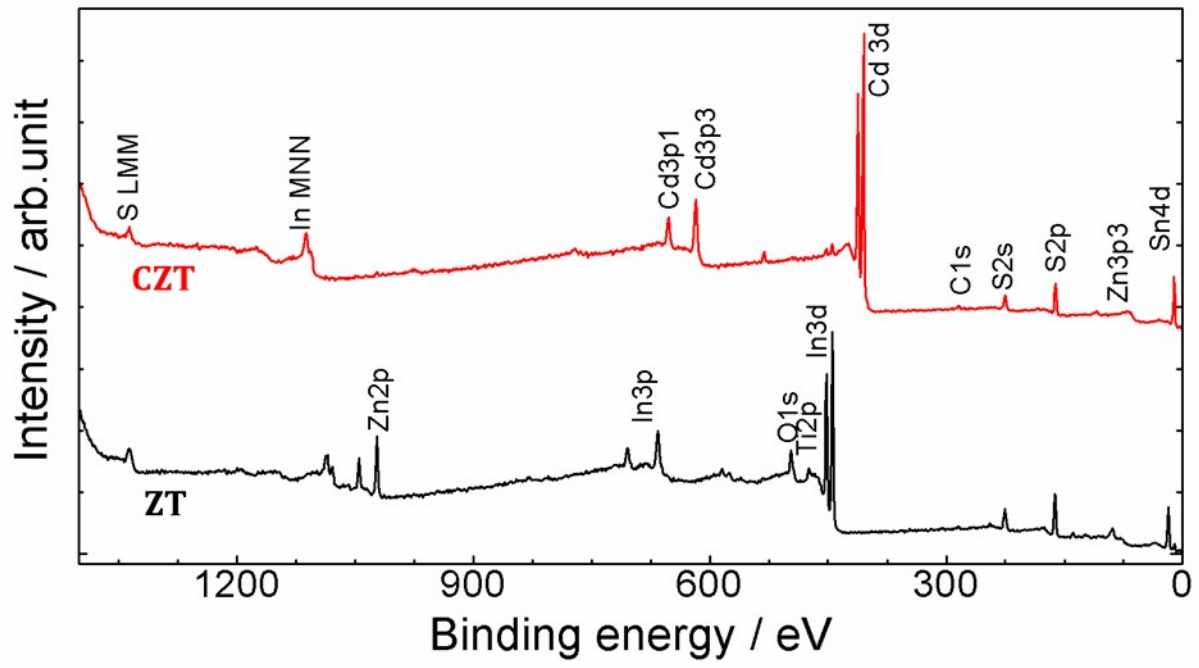

**Figure S1** XPS survey spectra for  $\text{ZnIn}_2\text{S}_4/\text{TiO}_2/\text{FTO}$  and  $\text{CdS}/\text{ZnIn}_2\text{S}_4/\text{TiO}_2/\text{FTO}$  films

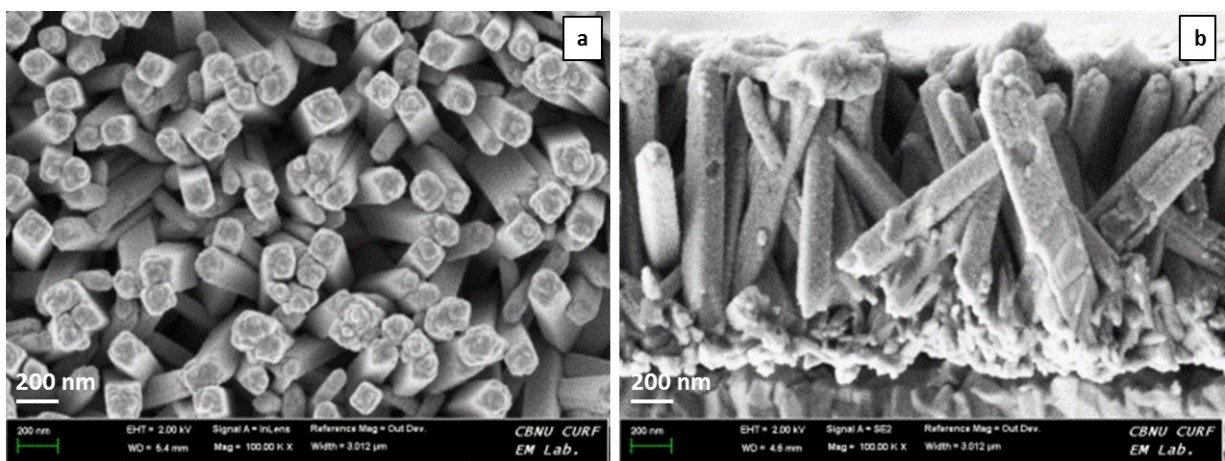

Figure S2 (a) SEM top view and (b) cross section view of CdS/TiO<sub>2</sub>

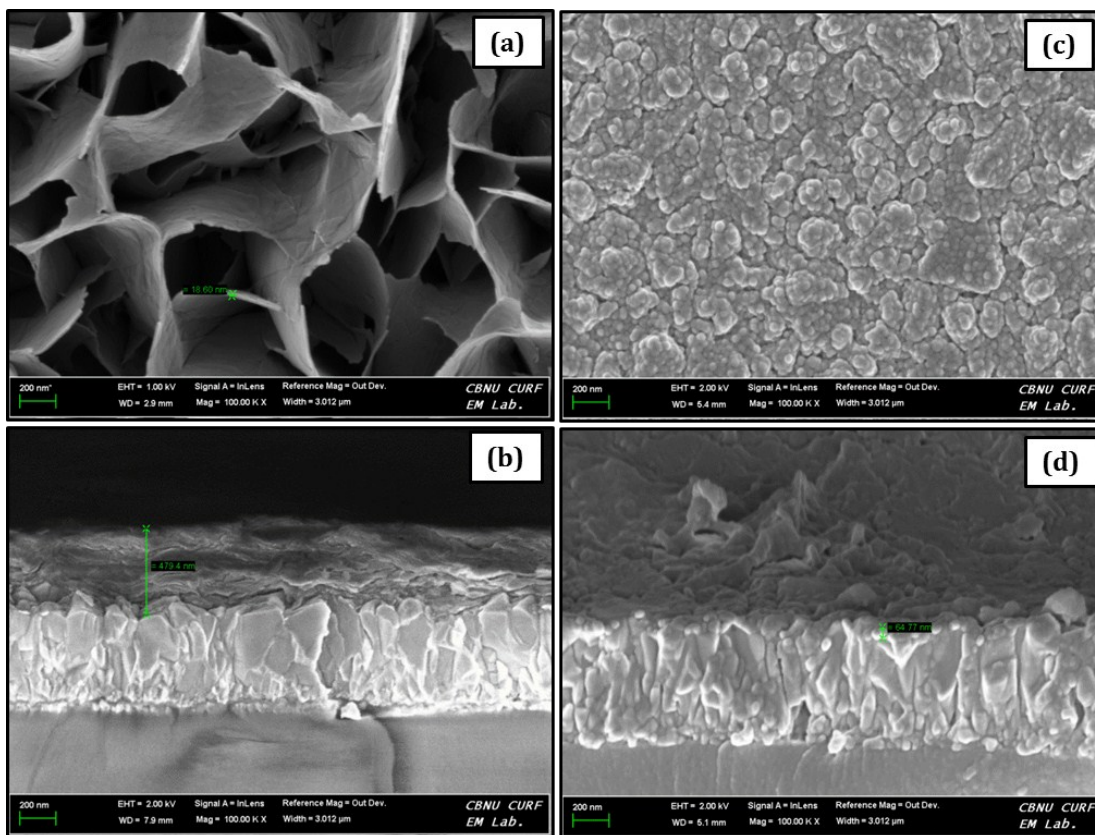

**Figure S3** Surface and cross-sectional morphologies of (a-b) ZnIn<sub>2</sub>S<sub>4</sub> and (c-d) CdS deposited on FTO substrate

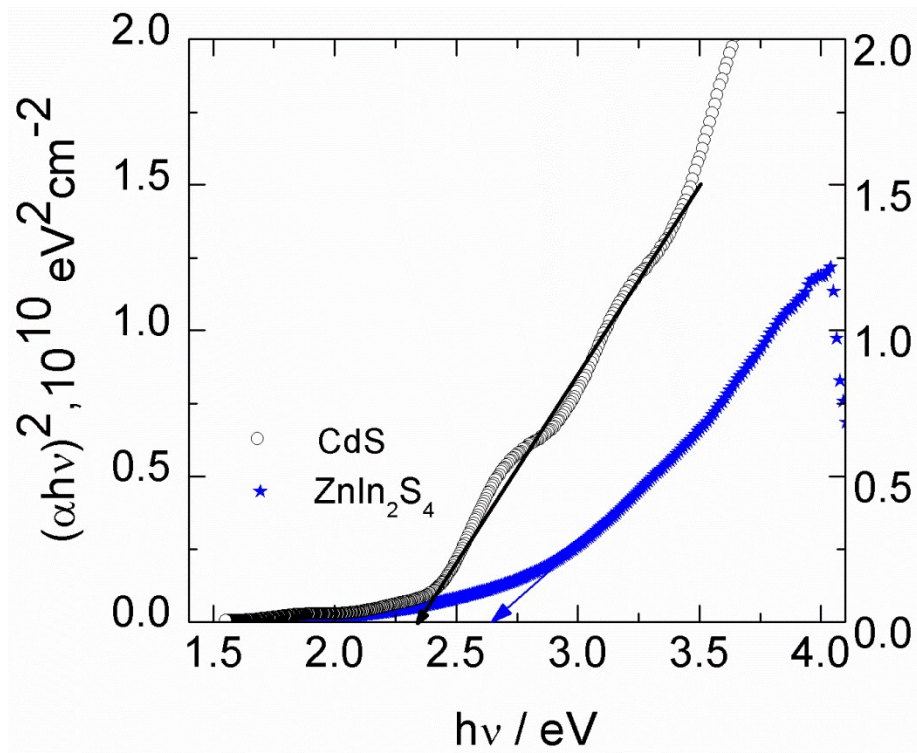

**Figure S4** Plot of  $(\alpha h\nu)^2$  vs.  $h\nu$  for CdS and ZnIn<sub>2</sub>S<sub>4</sub> samples
